# Supplementary material for: Impact of COVID-19 Telehealth Policy Changes on Buprenorphine Treatment for Opioid Use Disorder
Source: Atypon-hosted journal article supplement (doi:10.1176/appi.ajp.21111141), 2022-07-28
Supplement: appi.ajp.21111141.ds001.pdf [file appi.ajp.21111141.ds001.pdf]

**TABLE S1.** Defining types of telehealth visits for OUD using VHA stop codes and ICD-10 codes<sup>a</sup>

|                 | Clinic Stop Codes or CPT Codes                                                                                                                                                                                                                                                                                                                           | ICD-10 Codes for OUD   |
|-----------------|----------------------------------------------------------------------------------------------------------------------------------------------------------------------------------------------------------------------------------------------------------------------------------------------------------------------------------------------------------|------------------------|
| Video visit     | <ul style="list-style-type: none"> <li>- Secondary stop code: 690, 692, 693, 699, 644, 645, 136, 137, 444, 445, 446, 447, 440, 708, 723, 724, 490, 491, 179, 679, 648</li> <li>- CPT modifier=GT, 95</li> </ul>                                                                                                                                          | F11.1X, F11.2X, F11.9X |
| Telephone visit | <ul style="list-style-type: none"> <li>- CPT code=99441, 99442, 99443</li> <li>- stopcode=545, 527, 338, 103, 147, 148, 169, 178, 181, 182, 199, 216, 221, 229, 324, 325, 326, 424, 425, 428, 441, 451, 452, 453, 454, 462, 463, 476, 526, 527, 528, 530, 536, 537, 542, 543, 544, 545, 546, 579, 584, 597, 609, 611, 686, 729, 801, 802, 803</li> </ul> |                        |
| In-person visit | <ul style="list-style-type: none"> <li>- The primary stop code, secondary stop code, CPT code and CPT modifier does not include anything from video or phone visit.</li> </ul>                                                                                                                                                                           |                        |

<sup>a</sup> Modality of buprenorphine treatment visit was defined as a visit with either clinic stop codes or CPT code for that visit type with ICD-10 code for OUD with same provider ID as buprenorphine prescriber.

**TABLE S2.** Interrupted time series analyses of proportion of patients receiving buprenorphine treatment among those with OUD before and after COVID-19 telehealth buprenorphine policy changes

|                                                 | Pre-Pandemic Period               |        | Pandemic Period                            |                                   |         | Pandemic Compared to Pre-Pandemic Period |      |
|-------------------------------------------------|-----------------------------------|--------|--------------------------------------------|-----------------------------------|---------|------------------------------------------|------|
|                                                 | Monthly rate <sup>a</sup> (slope) | p      | Immediate Change in Proportion of Patients | Monthly rate <sup>a</sup> (slope) | p       | Rate Change                              | p    |
| Proportion of all buprenorphine patients        | 0.16                              | <0.001 | 0.46                                       | 0.19                              | < 0.001 | 0.03                                     | 0.12 |
| Proportion of patients initiating buprenorphine | -0.01                             | 0.16   | -0.03                                      | 0.004                             | 0.53    | 0.002                                    | 0.85 |
| Proportion of patients continuing buprenorphine | 0.17                              | <0.001 | 0.49                                       | 0.20                              | <0.001  | 0.03                                     | 0.22 |

<sup>a</sup> Change per month in the proportion of patients receiving buprenorphine treatment.

**TABLE S3.** Visit modality for buprenorphine treatment visits after COVID-19

|       | Video <sup>a</sup> | Phone <sup>b</sup> | Total number of patients receiving buprenorphine (also including those with only in-person visits) |
|-------|--------------------|--------------------|----------------------------------------------------------------------------------------------------|
| Urban | 36.6%<br>(n=5,481) | 45.7%<br>(n=6,842) | 14,989                                                                                             |
| Rural | 35.1%<br>(n=777)   | 46.5%<br>(n=1,029) | 2,213                                                                                              |

<sup>a</sup> Defined as patients who received any video visits in the post-COVID year (may have also received phone or in-person visits).

<sup>b</sup> Defined as patients who received phone visits (may have also received in-person visits but could not have received any video visits).
